# Supplementary material for: Application of Immersive Virtual-Reality-Based Puzzle Games in Elderly Patients with Post-Stroke Cognitive Impairment: A Pilot Study
Source: MDPI journal article supplement (doi:10.3390/brainsci13010079), 2022-12-31
Supplement: s1 [file s1]

Table S1. The self-report questionnaire associated with IVR

| Parts                                            | Items |                                                                                     |
|--------------------------------------------------|-------|-------------------------------------------------------------------------------------|
| I. Experience with using smart devices           | 3     | Previous experience using smart devices.                                            |
| II. VR equipment and training content experience | 6     | Comprehension, enjoyment, acceptability, stability, maneuverability, recommendation |
| III. Adverse reactions                           | 5     | Dizziness, nausea, headache, dry eyes, eye strain.                                  |
